# Supplementary material
Source: HighWire-hosted journal article supplement (http://qhc.bmj.com/highwire/filestream/147307/field_highwire_adjunct_files/0/bmjqs-2013-002776supp_appendix1.pdf)
Supplement: bmjqs-2013-002776supp_appendix1.pdf [file bmjqs-2013-002776supp_appendix1.pdf]

## **Appendix 1: Anomaly categories**

### ***Content categories***

- 1 The drug / medicinal product dispensed
- 2 The strength of medicine dispensed
- 3 The dosage form dispensed
- 4 The dispensed item is within date
- 5 The quantity dispensed
- 6 Other

### ***Labelling categories***

- 7 The patient name
- 8 The product name
- 9 The drug strength
- 10 The quantity of medication
- 11 The dosage form
- 12 The label describes the same dose instructions indicated on the prescription
- 13 The label provides all required additional warnings
- 14 The dispensing date
- 15 The dispensing pharmacy's address
- 16 Other
